# Supplementary material
Source: PubMed Central journal article supplement (PMC5340608)
Supplement: NIHMS844392-supplement-1.pdf [file NIHMS844392-supplement-1.pdf]

1 **Supplemental Table 1: Nanostring Analysis of Flow-Sorted tdTomato+ Cells from**  
2 **Bleomycin-Injured Mice**  
3

| Gene   | Name                                                                                                     | Twist1 FL+Bleo | Twist1 WT+Bleo | Ratio FL/WT | P-value |
|--------|----------------------------------------------------------------------------------------------------------|----------------|----------------|-------------|---------|
| Ccl5   | Chemokine (C-C motif) ligand 5                                                                           | 327            | 763            | 0.4         | 0.00030 |
| Ccl3   | Chemokine (C-C motif) ligand 3                                                                           | 357            | 693            | 0.5         | 0.00296 |
| Ccl11  | Chemokine (C-C motif) ligand 11                                                                          | 32             | 15             | 2.1         | 0.00912 |
| Ccl4   | Chemokine (C-C motif) ligand 4                                                                           | 170            | 290            | 0.6         | 0.02666 |
| Ifng   | Interferon, gamma                                                                                        | 21             | 40             | 0.5         | 0.02695 |
| Il6    | Interleukin 6                                                                                            | 76             | 132            | 0.6         | 0.04696 |
| Il1b   | Interleukin 1, beta                                                                                      | 1177           | 1887           | 0.6         | 0.23795 |
| Ccl19  | Chemokine (C-C motif) ligand 19                                                                          | 50             | 39             | 1.3         | 0.26813 |
| Csf3   | Colony Stimulating Factor 3(granulocyte)                                                                 | 4              | 3              | 1.4         | 0.27166 |
| Ccl21b | Chemokine (C-C motif) ligand 21                                                                          | 560            | 402            | 1.4         | 0.28150 |
| Tnf    | Tumor Necrosis Factor                                                                                    | 130            | 108            | 1.2         | 0.40560 |
| Tgfb1  | Transforming growth factor, beta 1                                                                       | 364            | 337            | 1.1         | 0.61105 |
| Cxcl1  | Chemokine (C-X-C motif) ligand 1                                                                         | 181            | 162            | 1.1         | 0.68362 |
| Ccl2   | Chemokine (C-C motif) ligand 5                                                                           | 368            | 333            | 1.1         | 0.74832 |
| Il12b  | Interleukin 12B (Natural Killer Cell Stimulatory Factor 2, Cytotoxic Lymphocyte Maturation Factor 2, P40 | 14             | 13             | 1.0         | 0.86060 |
| Il13   | Interleukin 13                                                                                           | 10             | 9              | 1.0         | 0.92639 |

4

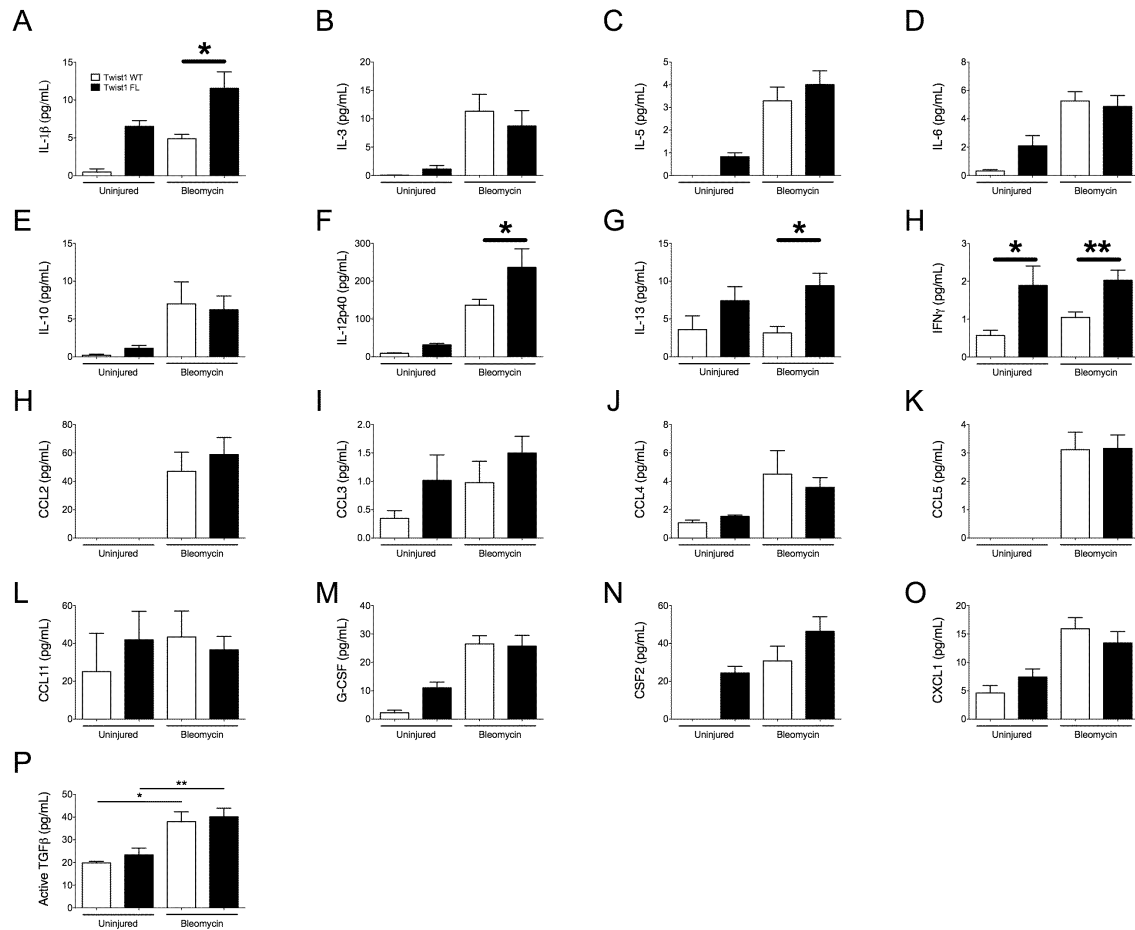

**Figure S1 Luminex analysis of the bronchoalveolar lavage (BAL) shows increases in several T-cell associated cytokines** BAL was obtained from uninjured and bleomycin-injured twist1 WT or twist1 FL mice. BAL was subjected to the Luminex platform as described in Materials and Methods. For all analyses, N=5 uninjured and 11-12 for bleomycin-injured). Data were analyzed by ANOVA followed by Neuman-Keuls post-hoc testing. (A) IL-1 $\beta$  (\*P<0.025 Bleomycin + twist1 WT v Bleomycin + twist1 FL), (B) IL-3, (C) IL-5, (D) IL-6, (E) IL-10, (F) IL-12 p40 (\*P<0.038 Bleomycin + twist1 WT v Bleomycin + twist1 FL), (G) IL-13, (H) IFN $\gamma$  (\*P<0.012 Uninjured + twist1 WT v Uninjured + twist1 FL, and \*\*P<0.005 Bleomycin + twist1 WT v Bleomycin + twist1 FL), (H) CCL2, (I) CCL3, (J) CCL4, (K) CCL5, (L) CCL11, (M) G-CSF, (N) CSF2, (O) Active TGF $\beta$  (by ELISA), and (P) CXCL1

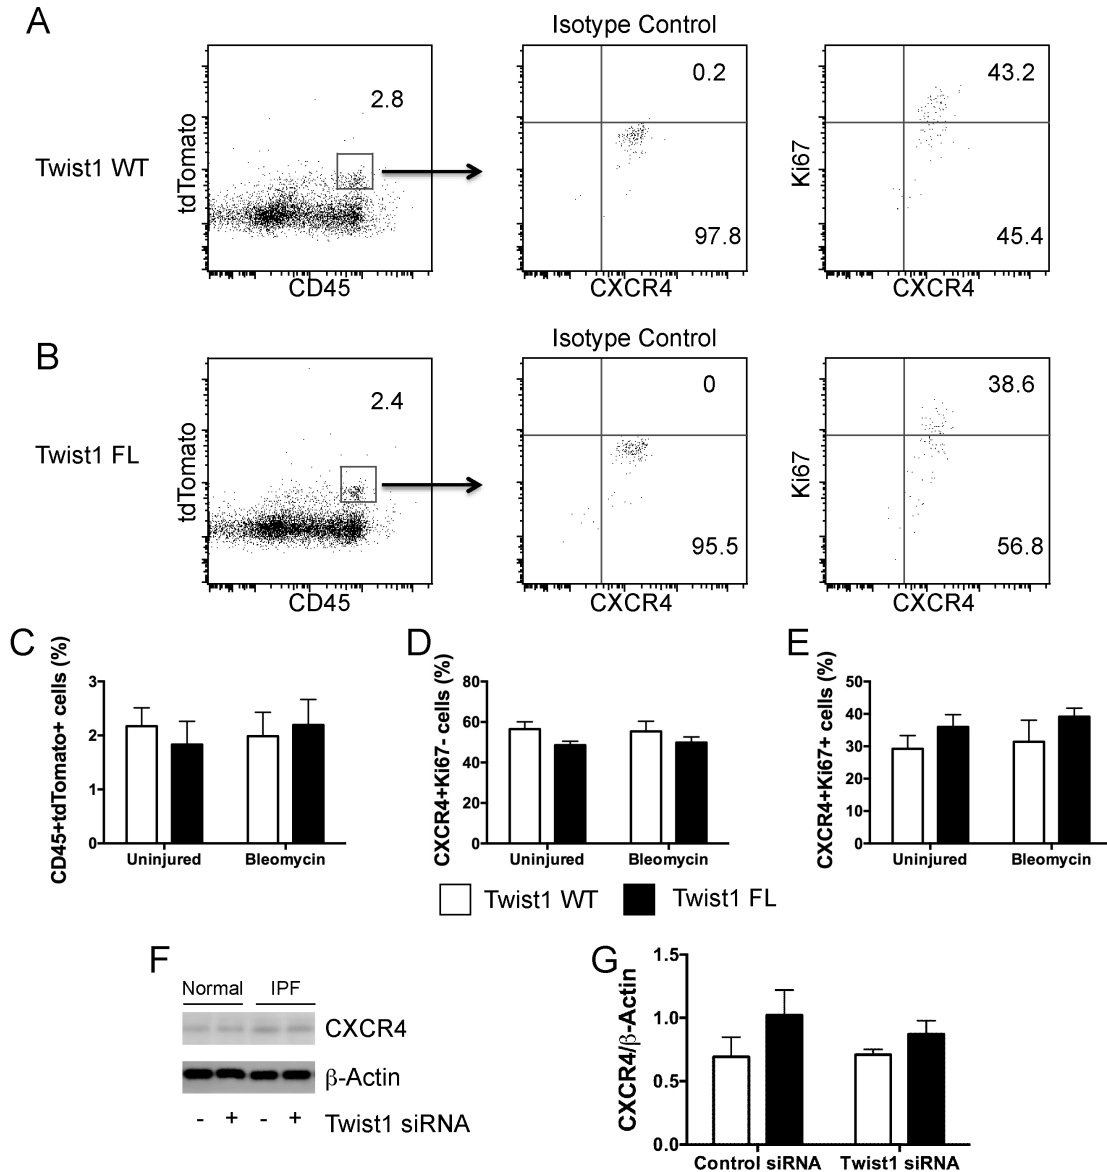

**Figure S2 A subset of mouse bone marrow cells are CD45+tdTomato+** Bone marrow cells were flushed from uninjured and bleomycin-injured Twist1 WT and Twist1 FL mice. (A-B) Dot plots for detection of tdTomato, CD45, CXCR4, and Ki67+ cells. Of the tdTomato+CD45+ cells, >95% are CXCR4+. (C) Quantification of CD45+tdTomato+ cells between twist1 genotype and by injury (N=5-8 per condition). (D) Quantification of CD45+tdTomato+CXCR4+Ki67- and (E) Ki67+ cells. No significant differences were observed between injury and genotype. (F) Representative immunoblotting for CXCR4 in normal and IPF lung fibroblasts with and without twist1 siRNA. (G) Densitometry of immunoblots in (F), n=3 per condition.

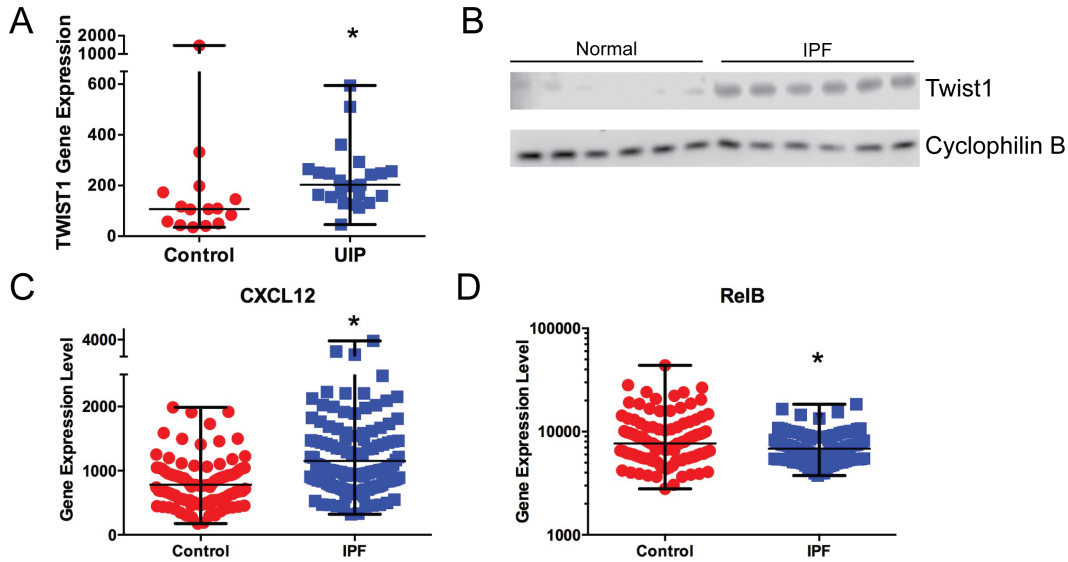

**Figure S3 Twist1 gene expression is increased in UIP lungs and IPF lung fibroblasts** (A) Gene expression analysis of UIP lungs (N=23) compared to normal (N=15) (Median  $\pm$  range,  $P < 0.004$  by Mann-Whitney). (B) Immunoblot of unstimulated normal and IPF lung fibroblasts incubated with 10% fetal bovine serum for twist1 (molecular weight=21 kDa). The membrane was stripped and blotting was performed for cyclophilin B (MW=21 kDa) (N=6 per condition). LGRC gene expression data for (C) CXCL12 ( $*P < 0.01$  by Mann-Whitney, N=134 IPF and 107 Controls) and (D) RelB ( $*P < 0.05$ ).
